# Supplementary material
Source: Springer Nature journal article supplement (https://www.springermedizin.de/resource/supplementary/12885_2013_4212_MOESM3_ESM.pdf/9465792)
Supplement: MOESM3 [file 9465792]

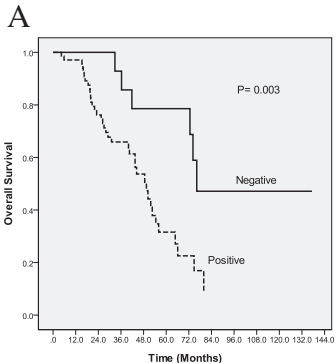

No. at risk  
 Neg 17 17 16 13 11 9 8 2 2 2  
 Pos 68 65 47 33 18 9 4

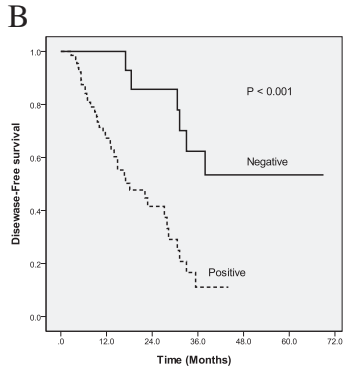

No. at risk  
 Neg 17 16 11 7 4 2  
 Pos 68 31 13 2

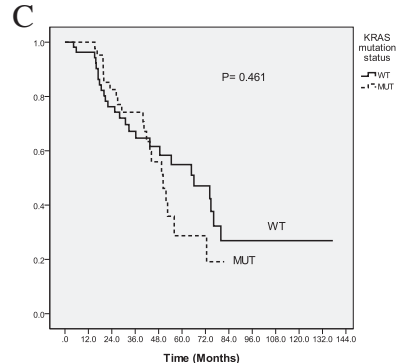

No. at risk  
 WT 54 51 38 27 19 15 10 2 2 2  
 MUT 44 44 31 23 13 4 3

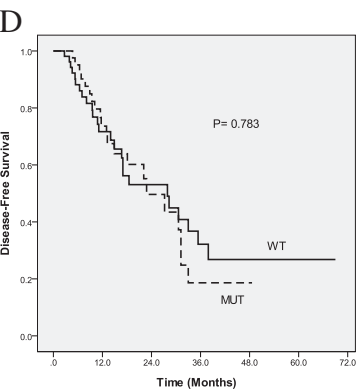

No. at risk  
 WT 54 26 16 7 3 2  
 WT 54 24 9 2 1  
 MUT 44

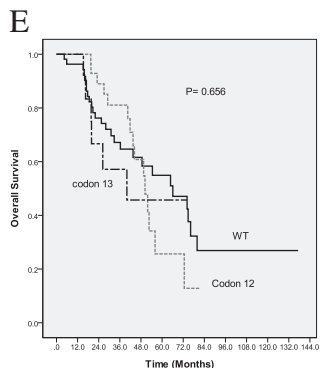

No. at risk  
 WT 54 51 38 27 19 15 10 2 2 2 1 1  
 Codon 12 32 32 23 17 11 3 2  
 Codon 13 12 12 8 6 2 1 1

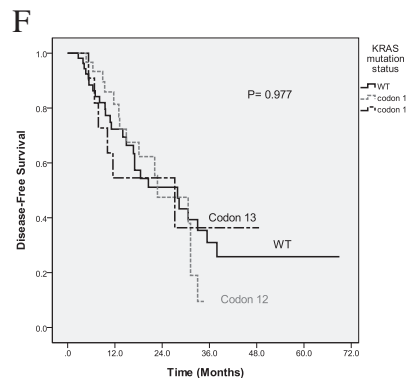

No. at risk  
 WT 54 27 16 7 3 2 1  
 Codon 12 32 18 6  
 Codon 13 12 6 3 2 1
